# Supplementary material for: Soluble PD-L1 works as a decoy in lung cancer immunotherapy via alternative polyadenylation
Source: PubMed Central journal article supplement (PMC8765052; doi:10.1172/jci.insight.153323), 2022-01-11
Supplement: jciinsight-7-153323-s173.pdf [file jciinsight-7-153323-s173.pdf]

## Supplementary Information

### **Soluble PD-L1 through alternative polyadenylation works as a decoy in lung cancer immunotherapy**

Ray Sagawa<sup>1,2</sup>, Seiji Sakata<sup>3</sup>, Bo Gong<sup>1</sup>, Yosuke Seto<sup>1</sup>, Ai Takemoto<sup>1</sup>, Satoshi Takagi<sup>1</sup>, Hironori Ninomiya<sup>4</sup>, Noriko Yanagitani<sup>5</sup>, Naoya Fujita<sup>13</sup>, Masayuki Nakao<sup>6</sup>, Mingyon Mun<sup>6</sup>, Ken Uchibori<sup>5</sup>, Makoto Nishio<sup>5</sup>, Yasunari Miyazaki<sup>2</sup>, Yuichi Shiraishi<sup>7</sup>, Seishi Ogawa<sup>8,9,10</sup>, Keisuke Kataoka<sup>11,12</sup>, Kengo Takeuchi<sup>3,4</sup>, Ryohei Katayama<sup>1\*</sup>

# Supplementary Figure S1

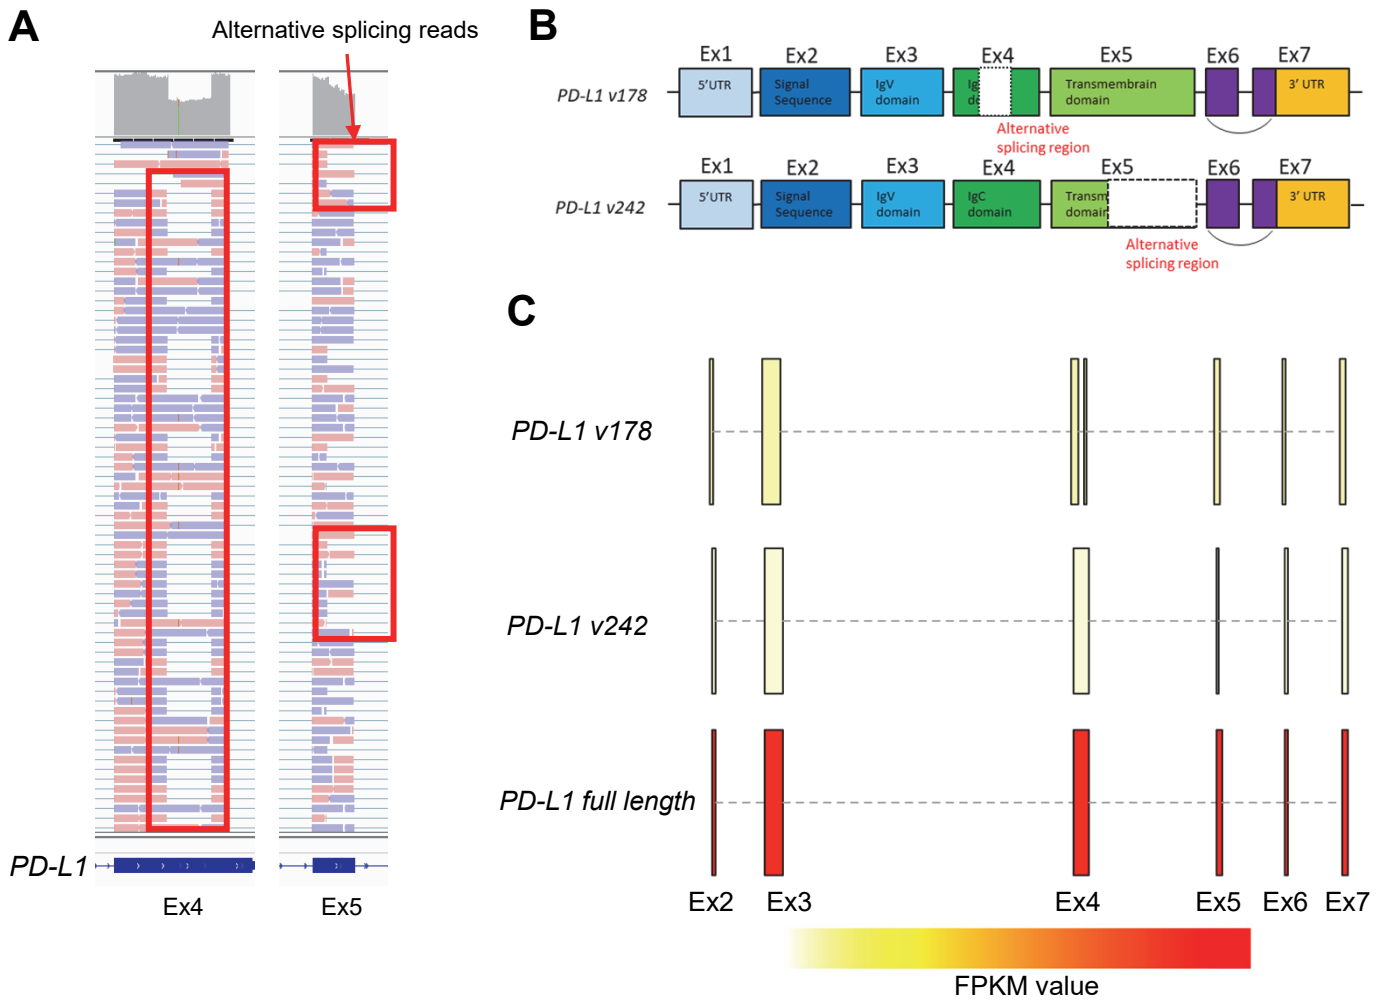

**Supplementary Figure S1. Methodology of PCR based PD-L1 variants ultradeep sequencing.** (A) IGV view data of the mapped sequence reads on PD-L1 exons 4 and 5. (B, C) Schematic diagram of PD-L1 variants identified by PCR based deep sequencing.

## Supplementary Figure S2

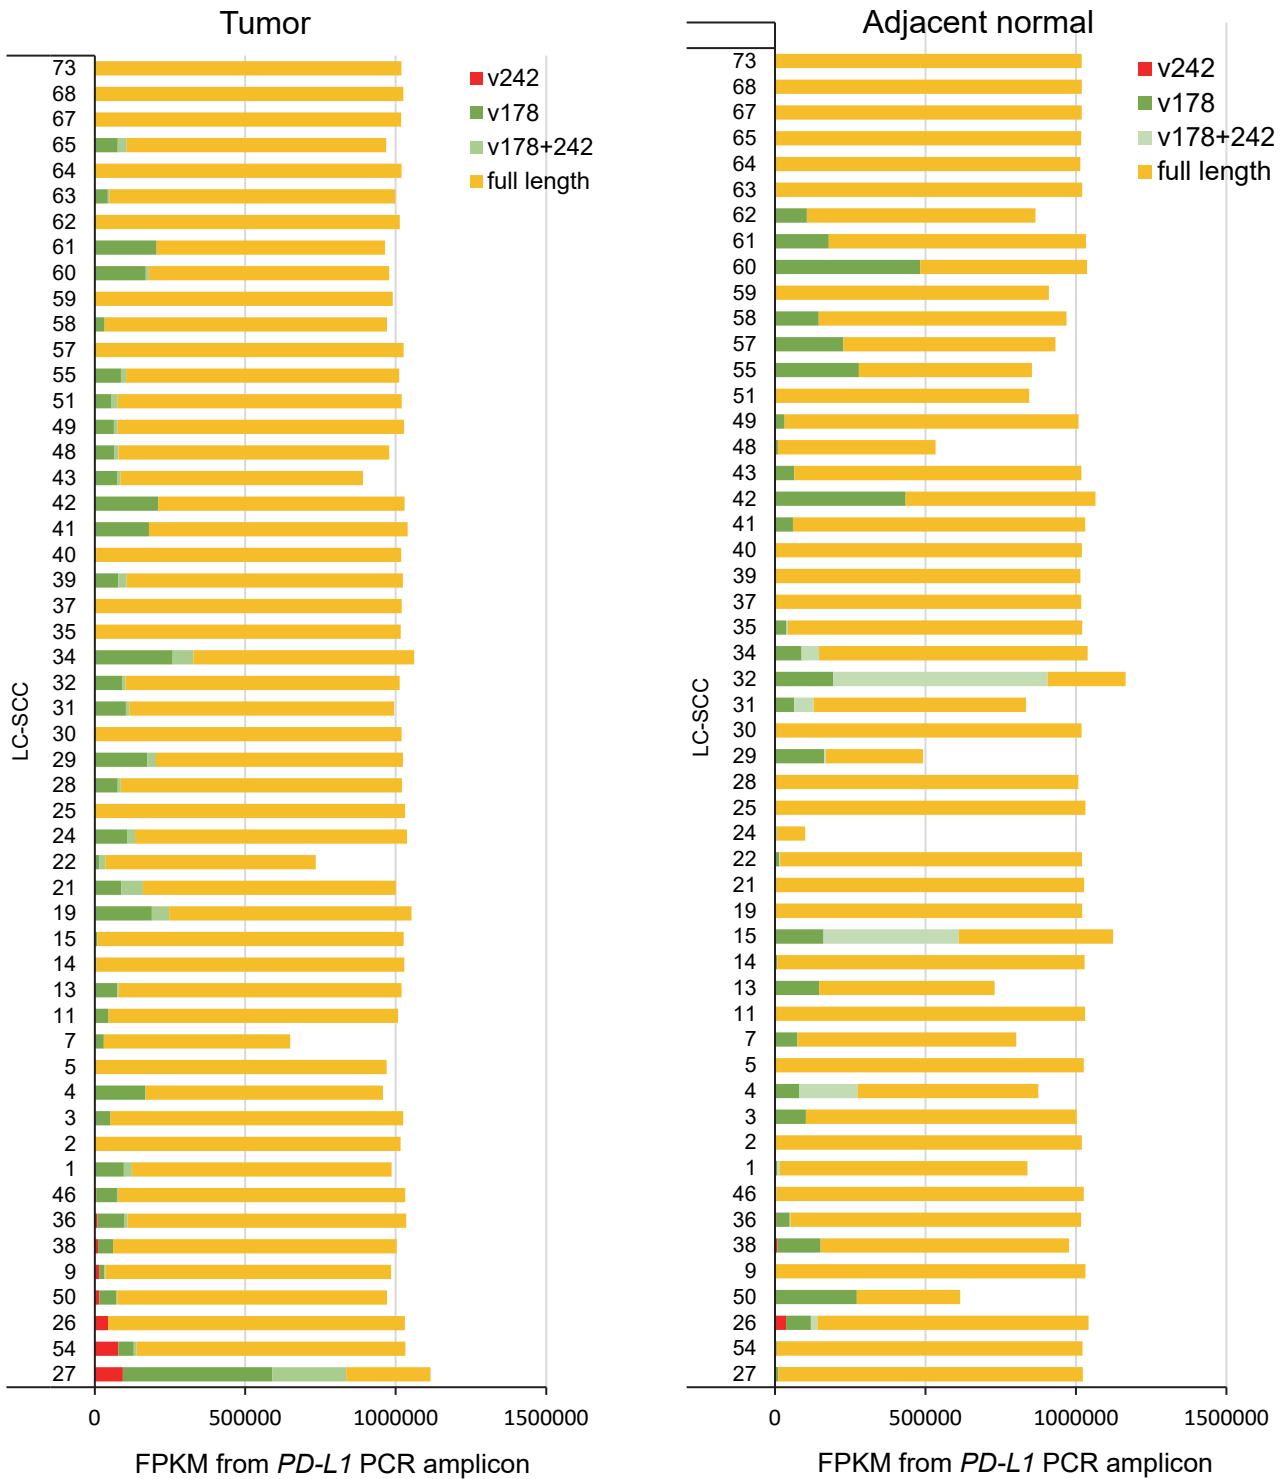

### Supplementary Figure S2. Some LUSC cases expressed PD-L1 splice variants.

Predicted sequence reads of PD-L1 variants containing exons 2–7 were analyzed by amplicon deep sequencing. This method does not reflect the existence of the PD-L1-vInt4 variant because of the lacking exon 7 and the addition of an alternative poly A at intron 4. Each color bar represents: red, v242; green, v178; light green, v178+v242; yellow, full-length PD-L1.

## Supplementary Figure S3

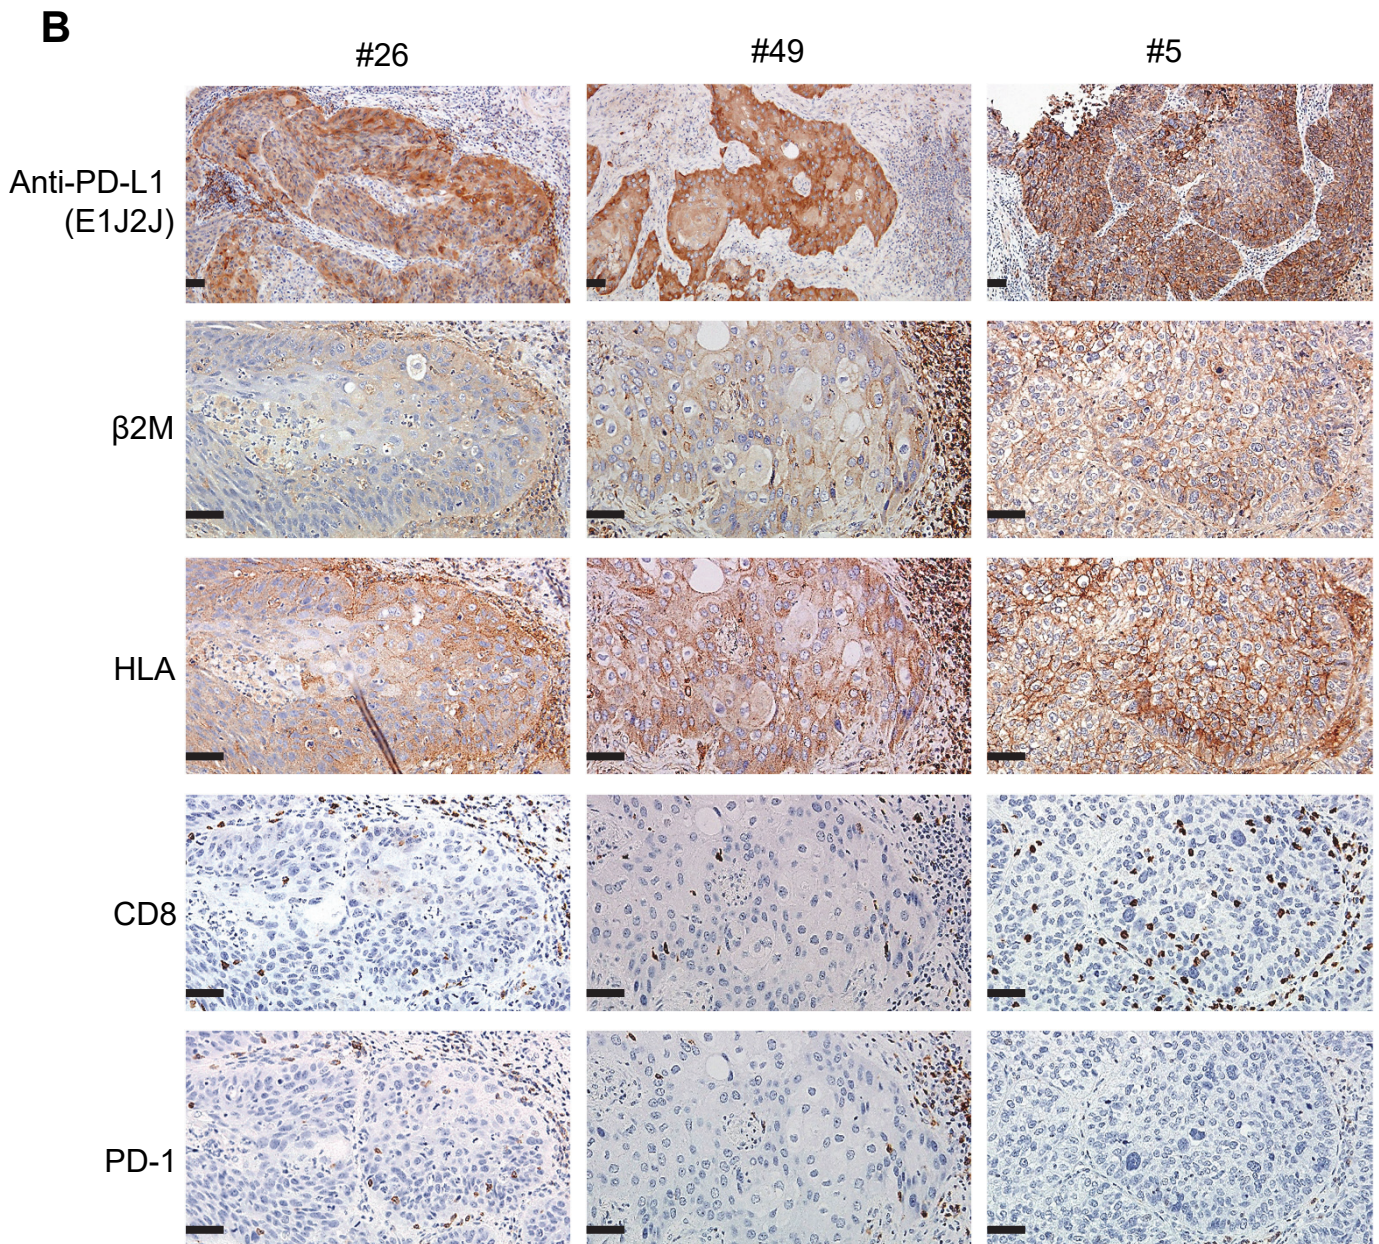

**Supplementary Figure S3. PD-L1 staining variation in different antibodies.** A few PD-L1 positive samples of LUSC were stained with  $\beta$ 2M, HLA, CD8, and PD-1. Each scale bar displays a length of 50  $\mu$ m.

## Supplementary Figure S4

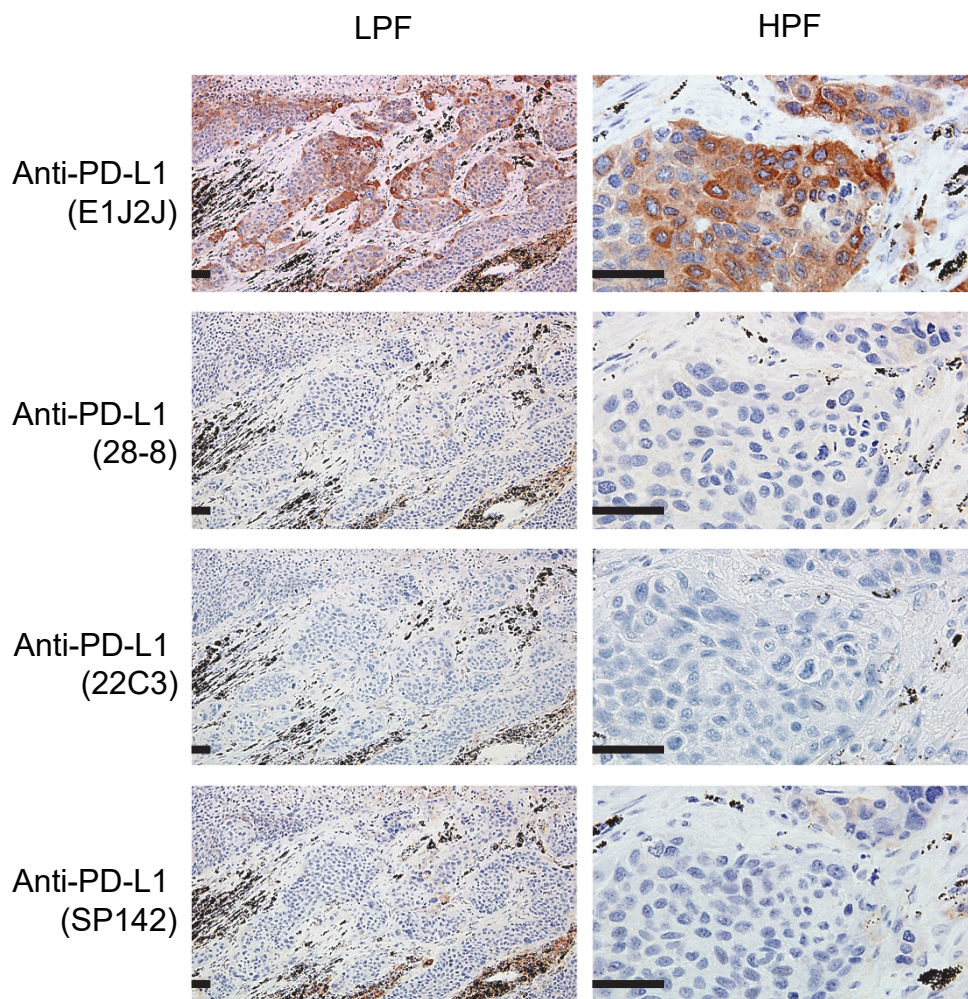

**Supplementary Figure S4. PD-L1 staining varies in different-site-recognizing antibodies.** A clinical sample of LUSC (#68) was stained with several different anti-PD-L1 antibodies. Each scale bar displays a length of 50  $\mu$ m. LPF: low power field. HPF: high power field.

## Supplementary Figure S5

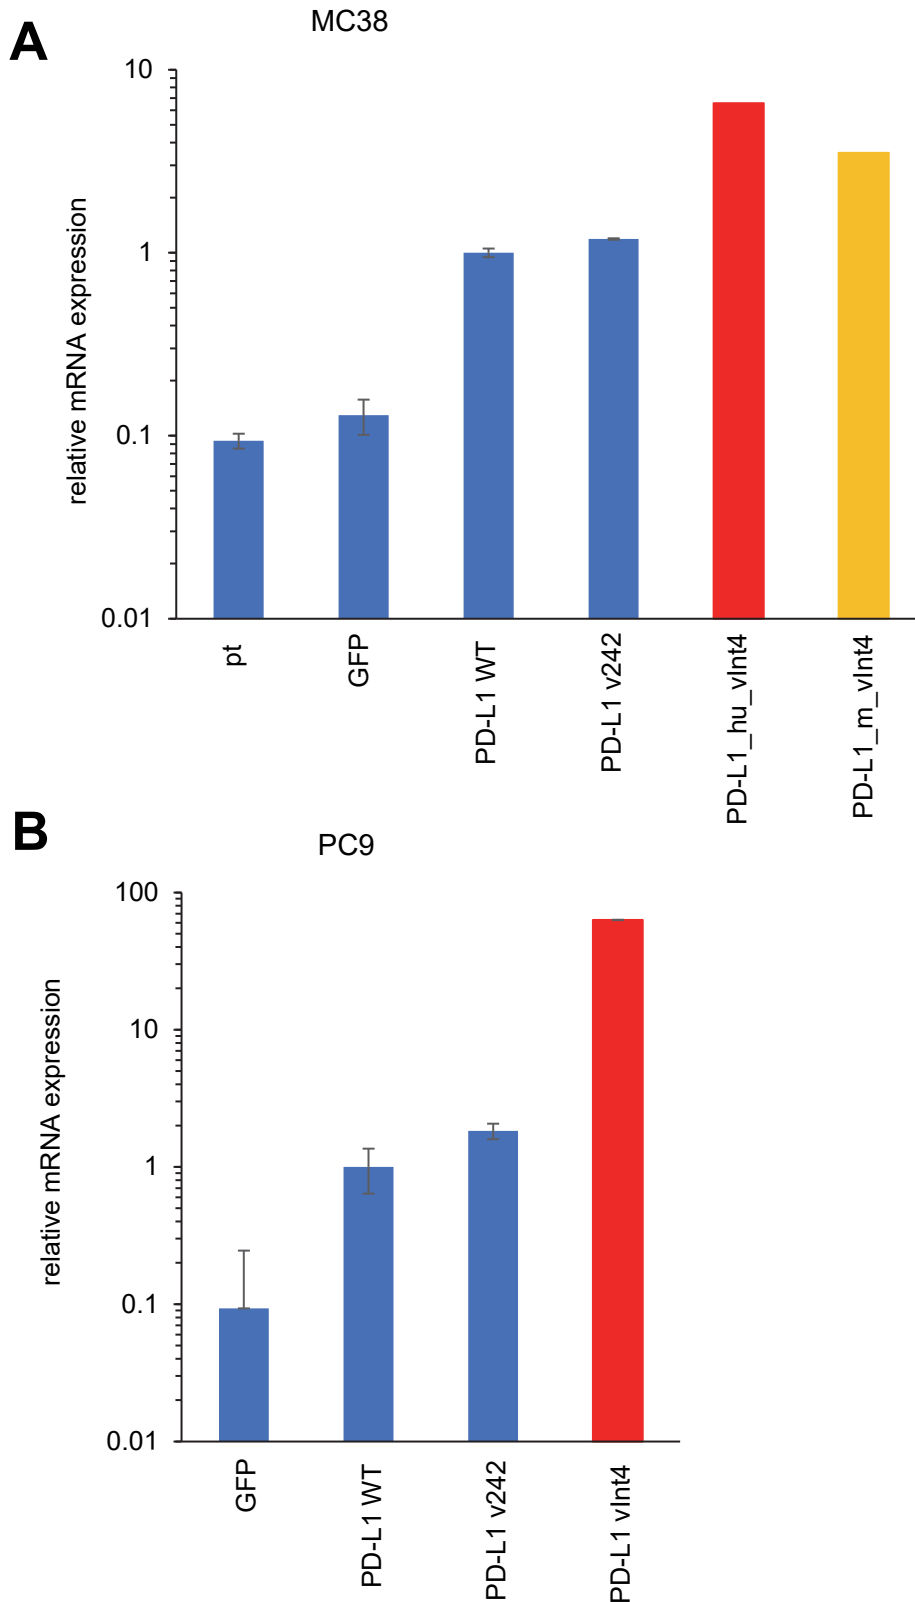

**Supplementary Figure S5. Lentivirus-infected MC38 or PC9 cells stably overexpressed PD-L1-vInt4.** (A) PD-L1 mRNA levels in MC38 parental cells and splicing variants or GFP overexpressing MC38 cells were quantified with real time PCR. (B) PD-L1 mRNA levels in splicing variants or GFP overexpressing PC9 cells were quantified with real time PCR. Data represent mean  $\pm$  SEM.

## Supplementary Figure S6

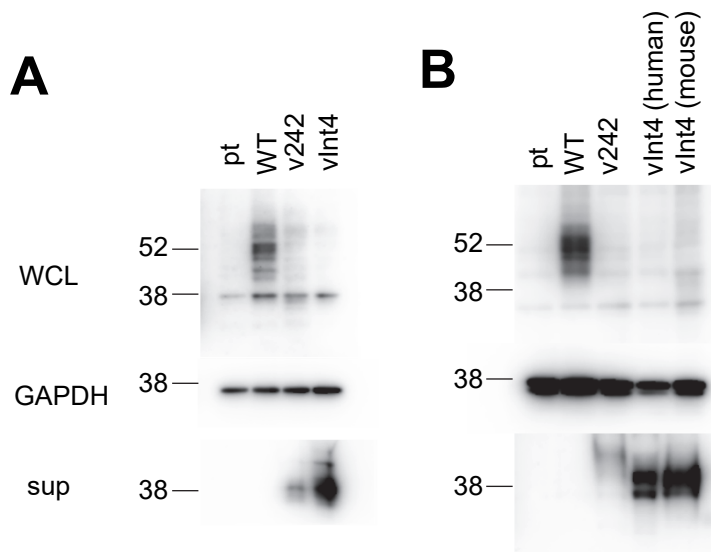

**Supplementary Figure S6. Lentivirus-infected MC38 or PC9 cells stably expressed and secreted PD-L1-vInt4 protein into the culture medium.**

Expression of PD-L1 WT and splicing variants were evaluated by Western blotting for PC9 cells (A) and MC38 cells (B). pt: parental cells. WCL: whole cell lysates.

## Supplementary Figure S7

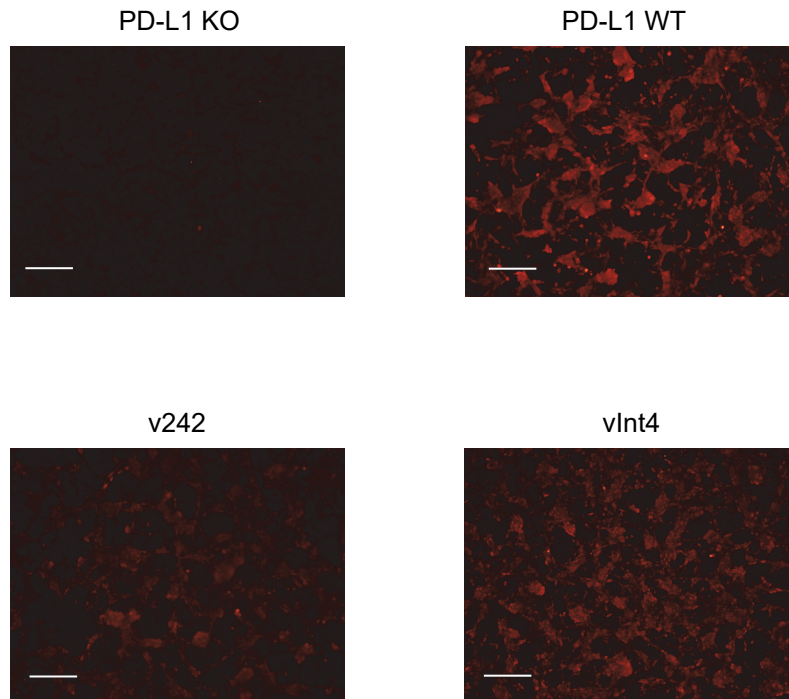

**Supplementary Figure S7. PD-L1 expression was confirmed in MC38 cells.** Immunofluorescence staining of murine PD-L1 and its variants, using mouse PD-L1 antibody (AF1019) and Alexa Fluor 594 labeled rabbit anti-goat IgG as the primary and the secondary antibodies, respectively. The exposure time was 350 msec. Each scale bar displays a length of 100  $\mu$ m.



## Supplementary Figure S8

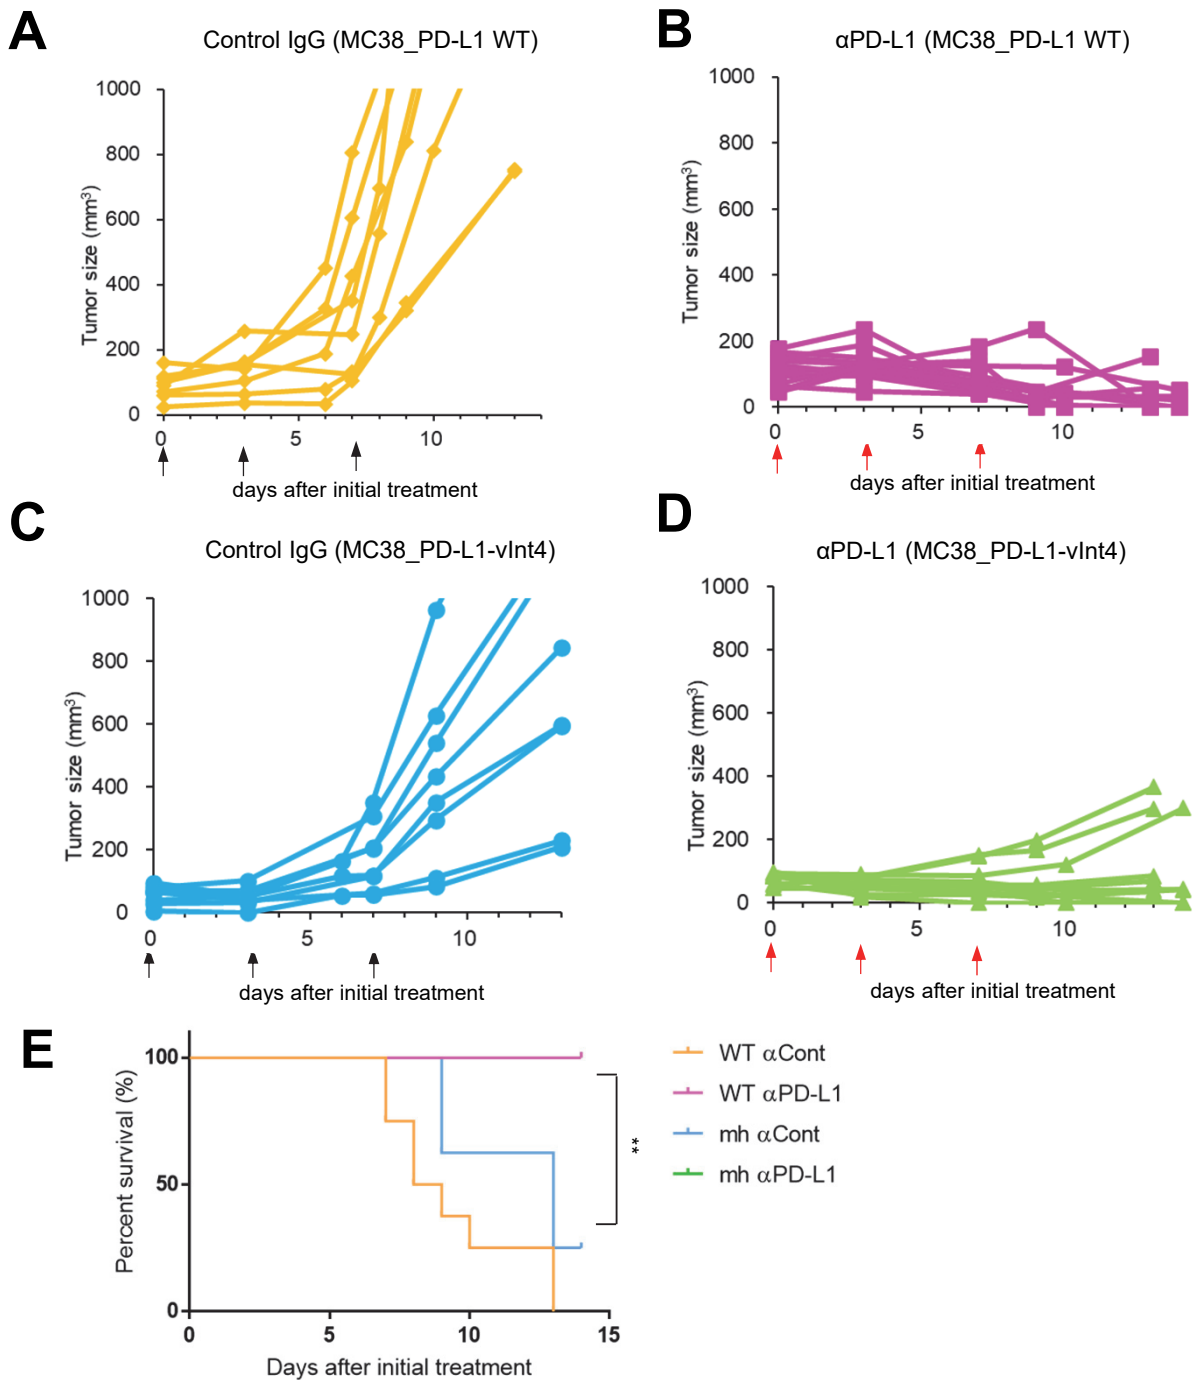

**Supplementary Figure S8. Tumor proliferation was suppressed when the dose of  $\alpha$ PD-L1 was increased. (A)(B)(C)(D)** Mice were injected with  $5 \times 10^5$  MC38 cells with overexpression of WT PD-L1 or PD-L1-vInt4 and treated with 200  $\mu$ g of anti-PD-L1 or control IgG three times a week by i.p. injection. Each figure represents a mice group of: (A) MC38\_mPD-L1 WT, treated with control IgG, n = 8, (B) MC38\_mPD-L1 WT, treated with  $\alpha$ PD-L1, n = 13, (C) MC38\_mPD-L1-vInt4, treated with control IgG, n = 8, (D) MC38\_mPD-L1-vInt4, treated with  $\alpha$ PD-L1, n = 12. The regimen of treatment is indicated by black arrows for control IgG and red arrows for  $\alpha$ PD-L1.(E) Kaplan–Meier curves of treated mouse groups in (A)–(D). \*\*,  $p < 0.01$  by Gehan-Breslow-Wilcoxon test.

## Supplementary Figure S9

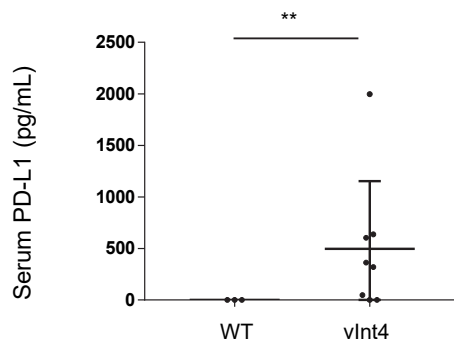

**Supplementary Figure S9. Serum PD-L1 levels were compatible with humans'.** Serum PD-L1 in mice were measured at day14. Data represent mean  $\pm$  SEM. \*\*,  $p < 0.01$  by paired two-tail Student's  $t$  test.

## Supplementary Figure S10

**A**

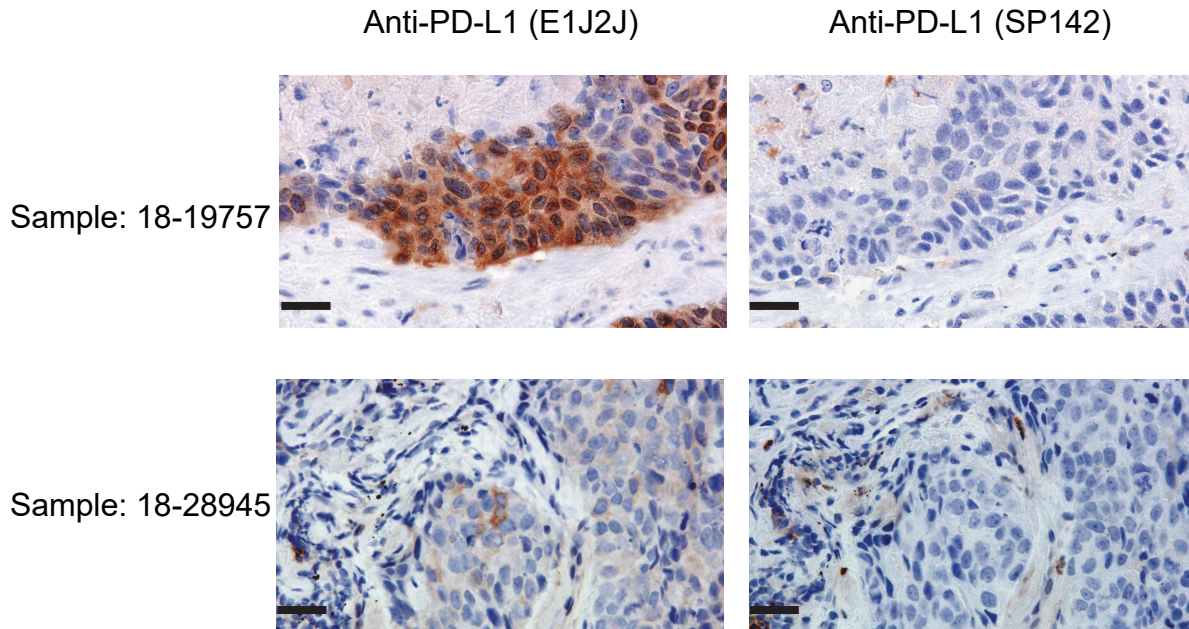

**B**

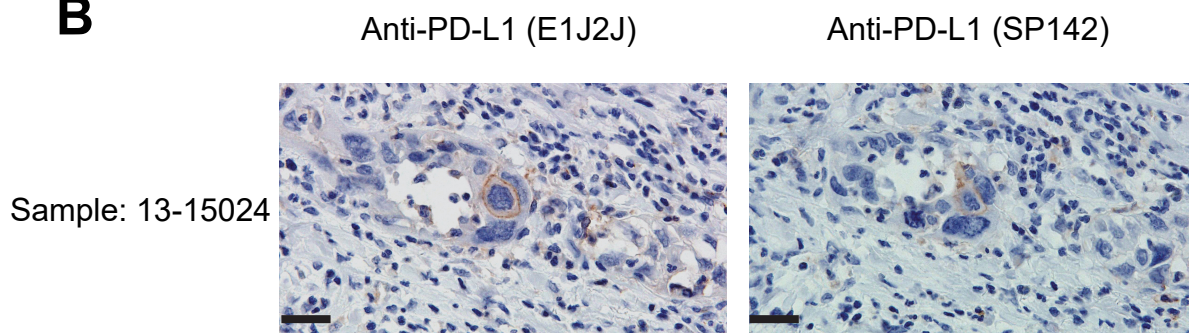

**Supplementary Figure S10. PD-L1 staining performed in prior-treatment clinical samples of patients who received atezolizumab for their treatment.** (A) Staining pattern of progressive disease cases to anti-PD-L1 blockade therapy. (B) Staining pattern of partial response case. Each scale bar displays a length of 50  $\mu$ m.
